# Supplementary figures and images for: Hepatitis C virus deep sequencing for sub-genotype identification in mixed infections: A real-life experience
Source: PubMed Central journal article supplement — Int J Infect Dis. 2018 Feb;67:114–7. doi: 10.1016/j.ijid.2017.12.016 (PMC5812776; doi:10.1016/j.ijid.2017.12.016), 2018-02

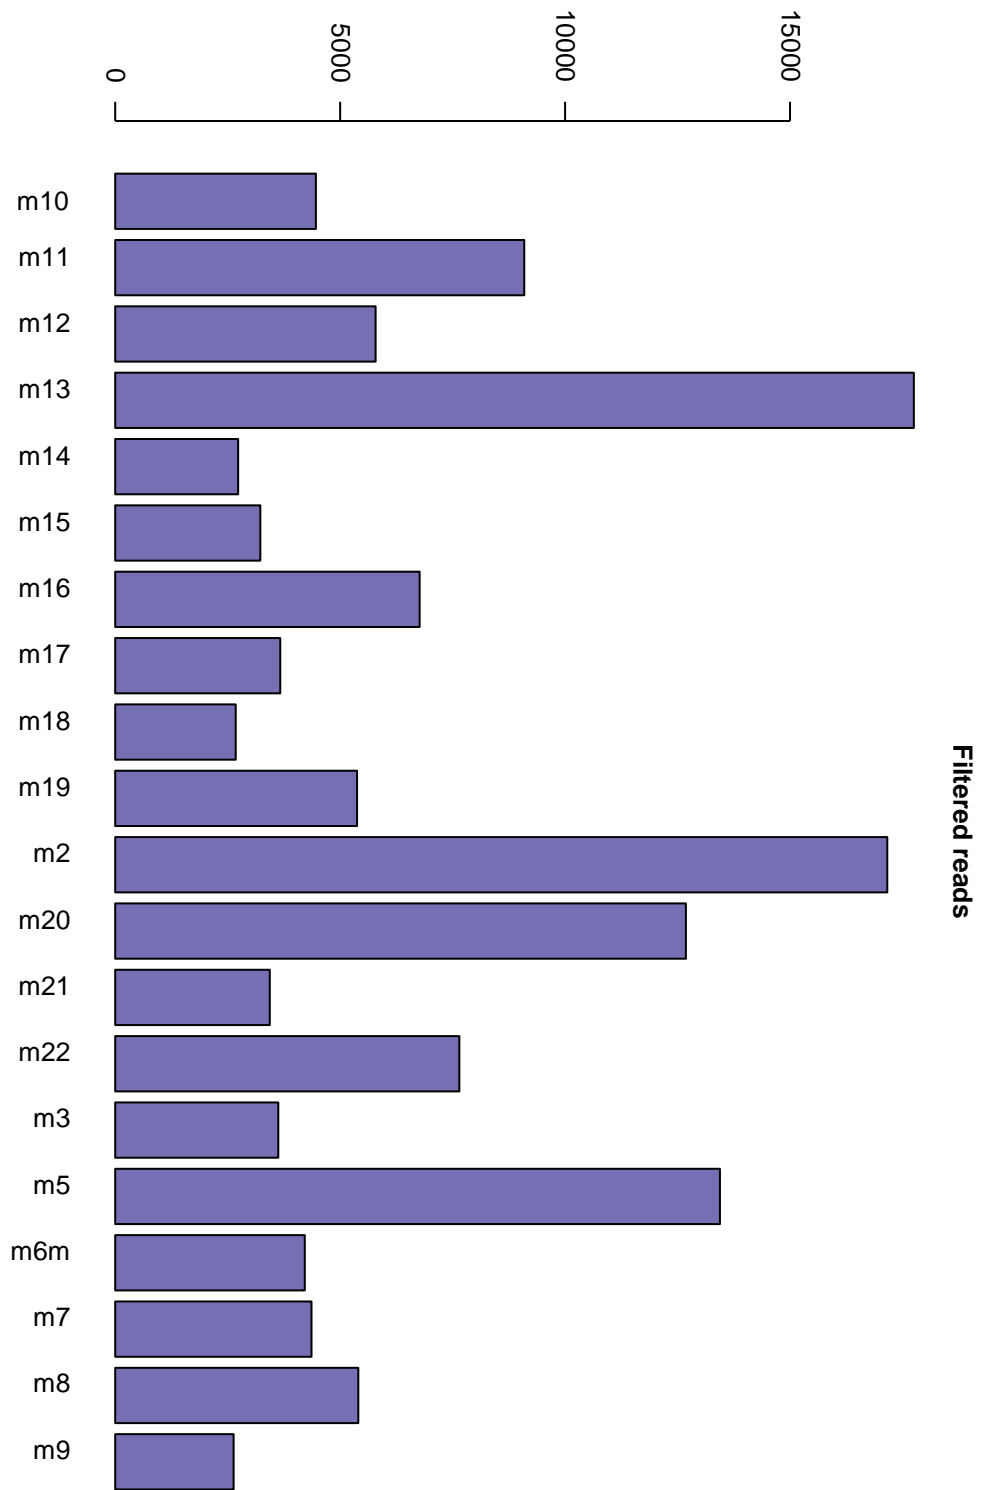

A

B

UPGMA Tree RefSeqs v070113 (K80, gamma=0.42)

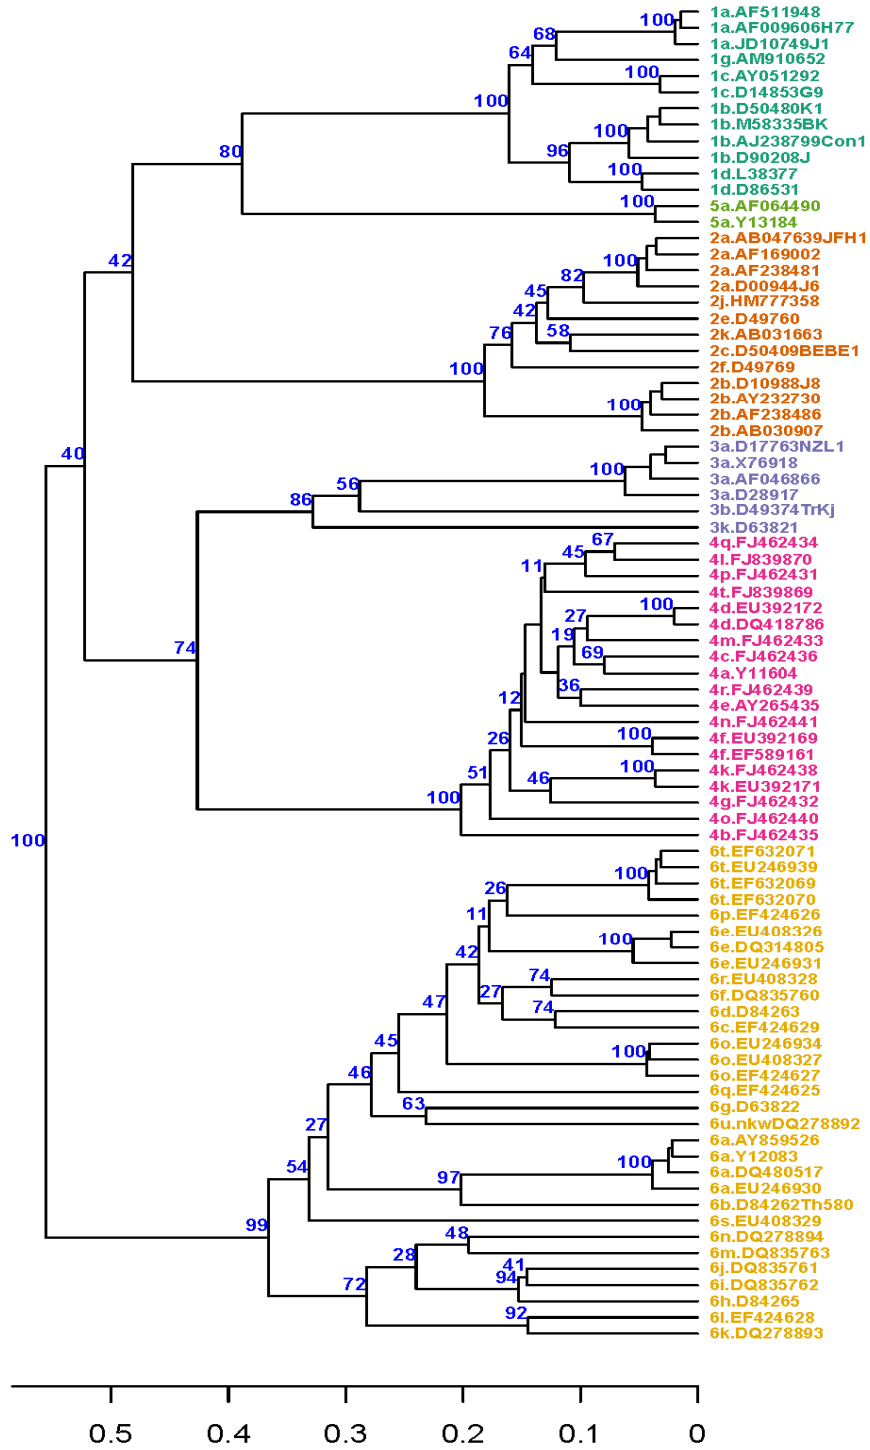

Supplement: mmc1.pdf [file mmc1.pdf]
